# Supplementary material
Source: publisher site journal article supplement (https://www.dovepress.com/article/350266)
Supplement: Supplementary file 1 [file get_supplementary_file.php]

**Appendix**


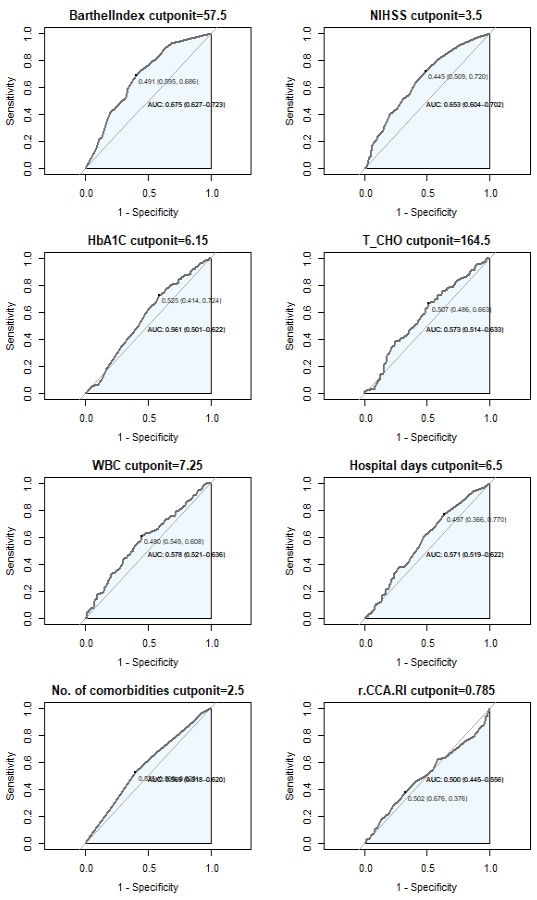


**Appendix 1.**

The ROC (AUC: area under curve, measurement) and cut-off point searching (with referenced to Table 6)
